# Supplementary material for: Lumbrokinase, a Fibrinolytic Enzyme, Prevents Intra-Abdominal Adhesion by Inhibiting the Migrative and Adhesive Activities of Fibroblast via Attenuation of the AP-1/ICAM-1 Signaling Pathway
Source: Biomed Res Int. 2023 Jan 12;2023:4050730. doi: 10.1155/2023/4050730 (PMC9851794; doi:10.1155/2023/4050730)
Supplement: Supplementary Materials — Supplementary Material and Methods. Fibrin Plate Assay. Fibrinogen (#F3879) and thrombin (#T6884-250UN) were purchased from Sigma-Aldrich (St. Louis, MO, USA). Fibrinogen was diluted in phosphate-buffered saline (Welgene, Gyeongsan, Korea) to make 0.3% concentrated fibrinogen, which was incubated at 30°C for 60 min. After completely dissolving the fibrinogen, the fibrinogen solution was filtered through a 0.2 μm filter, and 10 μL of 20 U/mL thrombin was added to 15 mL of the fibrinogen solution. Next, 13 mL of 1% agarose solution was added to 15 mL of the fibrinogen-thrombin mixture [1, 2]. Afterward, 10 mL of the solution was clotted in a 100π Petri dish. The plates were allowed to stand at room temperature (25°C) for at least 30 min before being used. After clotting, holes were made using a Pasteur pipette. Next, 50 μL of the indicated concentration of lumbrokinase was dispensed into the holes of the plates, which were then incubated for the indicated hours at 37°C. Plasmin (P1867-500UG, Sigma, St. Louis, MO, USA) was used (0.1 U/mL) as a positive control. The fibrinolytic activity was calculated as the lytic area surrounding each well of the fibrin plate. The diameter of the area was measured with a ruler. Bleeding Time and Hematological Test. Bleeding time was measured using primary saline [3]. This test is performed by immersing the tip of the ear in 0.9% saline at 37°C for 2 min. Then, the tip is transfixed with a scalpel blade (approximately 0.5 cm), after which the cut ear tip is resubmerged in the warm saline, and the time to cessation of bleeding is recorded. A normal value is defined as <5 min, and an abnormal value is defined as >15 min. After measuring the bleeding time, whole blood was collected from the carotid artery. The tests of complete blood count and prothrombin time were performed in the laboratory of Chung-Ang University Hospital. Blood was collected into tubes containing ethylenediaminetetraacetic acid (EDTA) and tubes containing sodium citra [file 4050730.f1.zip]

Archive with 2 entries (2 files):
- Supplementary data and Table -QCU.docx
- Supplementary data-revised {2}.docx
